# Supplementary material for: Genome-wide identification, classification and expression profile analysis of the HSF gene family in Hypericum perforatum
Source: PeerJ. 2021 May 6;9:e11345. doi: 10.7717/peerj.11345 (PMC8106910; doi:10.7717/peerj.11345)
Supplement: Supplemental Information 1 [file peerj-09-11345-s001.xls]

## Sheet: ERF gene sequences
Table S1 List of the 23 HpHSF genes identified in this study
Gene	Gene ID	Sequence Type	Sequences
HpHSF01	HperS113g0097	Protein	MVPAENGEASASDSQRPLPTPFLTKTYQLVDDEEIDDVISWNDDGSSFIVWNPMVFARDLLPKYFKHNNFSSFVRQLNTYGFRKVVPDRWEFSNDCFRRGEKRLLCDIQRRKVSTQASPLAAAAAAAQASPSVTVAIPIISPSNSGEELAVSSNSSASRTATVVPNAELMEENERLRRENSQLKKELLEAKGLVSNIFSMVSSYSDAGRRRSRIPAGEVRQLDLLPTGEEELPAPAEEEKEGCGEMLFGVAIGVKRGRSEERESDTALQLGVGSGKSEPLEFRNGQNGNNLTA*
		CDS	ATGGTGCCGGCGGAGAACGGCGAGGCGTCGGCGTCGGACTCGCAGAGGCCCCTCCCGACGCCGTTTCTAACCAAAACGTACCAGCTGGTCGACGACGAGGAGATCGATGACGTCATCTCGTGGAACGACGACGGATCGAGCTTCATCGTGTGGAATCCCATGGTCTTCGCCCGTGATTTGCTCCCCAAGTACTTCAAGCACAATAACTTCTCCAGCTTCGTCCGCCAATTAAACACCTACGGGTTTCGGAAAGTTGTTCCCGACCGTTGGGAATTCTCCAACGACTGTTTCCGGCGGGGGGAGAAGCGGTTACTATGCGACATCCAGAGGCGGAAGGTGTCAACTCAGGCGTCGCCGTTGGCGGCTGCGGCGGCGGCAGCGCAGGCATCTCCGTCGGTA…
HpHSF02	HperS020g0043	Protein	MNLRGGVKQEYYYHHGNAACAPSSSCSIPKPVEGLHEGGPPPFLIKTYEIVEDPDTNYMVSWSRGNNSFIVWQPLDFSMILLPRYFKHGNFSSFVRQLNTYGFRKVDPDRWEFANKGFLRGQKHLLKNIRRRRTVPQQQSSQQSLDPCVEVGRFGLDGEVDRLMRDKQVLMVELVKLRQEQQTSKACLQLMEQRVKRTETKQLQMMTFLARAMRNPDFVNGLSQQKEKRTELHEKKRRRSIDQYAFNAEIEELGNVSGGGSSQQGPSFVKVELQDSGDLTDQLDDSELDELHAIEIEGLRGGHLTRENSEEVVQMGKFGEEQRGIIKDLEDGFWEGLLNGGHNVGKEIDYFGDDVEDDEERVNVMVEHLGYLCYNTSQGNY*
		CDS	ATGAATCTTAGAGGGGGAGTGAAGCAAGAGTACTACTACCACCATGGGAATGCTGCTTGTGCTCCATCATCATCTTGCAGTATCCCTAAACCAGTGGAGGGTCTCCATGAAGGTGGGCCACCTCCATTCCTGATCAAGACATATGAGATTGTTGAGGACCCAGACACGAATTACATGGTTTCTTGGAGCAGAGGTAACAACAGCTTCATCGTGTGGCAGCCTTTGGACTTCTCCATGATCCTCCTCCCCAGGTACTTCAAGCACGGAAACTTCTCAAGCTTTGTCAGGCAGCTCAATACTTATGGGTTTAGAAAAGTTGATCCAGACAGATGGGAGTTTGCTAATAAAGGGTTTCTTAGAGGGCAAAAGCACCTCCTAAAGAACATCAGAAGGAGAAGA…
HpHSF03	HperS219g0006	Protein	MVFCVESQKAVPAPFLTKTYQLVDDPLTDHIVSWGDDEATFIVWRPPEFARDLLPNYFKHCNFSSFVRQLNTYGFKKVVADRWEFANDYFRKGAKQLLSEIHRRKSHNHHHQHQPHHQQNQSEYNFQDQFPSSQFFIQPEEHTYSWNNNNNNNNIDHPQFFSPKQASPVRSDTLAALSEDNERLRKKNYVLLSELSHMKTLYNDIIYFIQNHAKPVDKLIEYGPSCGNIYDQDQVGFVADDDDGEPNGHNFVKLFGVPLIGKKRINDRRREPGVKILGAWTRPFLGPVLGIVRASPRLSWLLTDWTGLPLSQAWTQAPPKISAHSVA*
		CDS	ATGGTATTCTGTGTGGAGTCACAAAAAGCGGTACCAGCGCCGTTCCTAACCAAGACTTACCAGCTGGTCGATGACCCTCTAACCGATCACATAGTGTCTTGGGGCGACGACGAGGCCACCTTCATCGTGTGGAGGCCGCCGGAGTTCGCGAGGGACCTTCTTCCTAACTACTTCAAGCACTGCAACTTCTCTAGCTTCGTCAGGCAGCTCAATACTTACGGATTTAAAAAGGTGGTTGCAGATAGATGGGAATTTGCAAATGACTACTTCAGGAAAGGAGCAAAACAATTGCTATCAGAAATCCACAGGAGAAAAAGCCATAACCATCATCACCAACATCAACCACATCATCAACAAAACCAATCAGAATATAATTTCCAAGACCAATTTCCTTCATCC…
HpHSF04	HperS024g0021	Protein	MDRDTEINNNEGLLRKQTTPPFLLKTYMLVEDPATDEVVSWNGEGTGFVVWQPAEFARDLLPTLFKHSNFASFVRQLNTYGFRKVATSRWEFFNDMFRKDERELLCQIRRRKSWSNKQQPNTQNQQDQLIDEDQRSSSTSSLSEYSNILVGENRRLKKENGVLSSELTSMKRKCKELLDLVSRYTHLDKEEEEGPKLFGVVLEVEKKRKRVEFSQSASVLLS*
		CDS	ATGGATCGTGACACGGAGATTAATAATAATGAGGGTTTACTGAGGAAACAAACCACGCCACCGTTCTTGTTGAAGACGTACATGCTGGTGGAGGATCCGGCCACCGACGAGGTCGTCTCGTGGAACGGCGAGGGGACGGGTTTCGTCGTCTGGCAGCCGGCGGAGTTCGCCCGAGATCTTCTCCCTACCCTCTTCAAGCACAGCAACTTCGCAAGCTTCGTTCGCCAACTTAATACTTATGGATTCCGGAAAGTGGCAACAAGCCGGTGGGAGTTCTTTAATGACATGTTCCGGAAGGATGAAAGGGAGTTACTATGTCAAATCCGTAGGAGGAAATCATGGTCCAACAAGCAACAACCAAATACACAAAACCAACAAGATCAGCTTATTGATGAAGAC…
HpHSF05	HperS024g0048	Protein	MLVEDPATDEVISWNGDGTGFVVWQPAEFARDLLPTLFKHSNFSSFVRQLNTYGFRKVATSRWEFCNDMFRKGERELLCQIRRRKAWSKSNAQTQQVDEDQRSSSTSTSSEHTTLVDENRRLKEENGVLSSELTSMKRKCRELLGLVSRYAHLEKGDEEGPKLFGVVLEVEGDREKKRKRAEISESASVLLSQSCN*
		CDS	ATGCTGGTGGAGGATCCGGCGACCGACGAGGTGATCTCGTGGAACGGCGACGGGACAGGGTTCGTCGTCTGGCAGCCGGCCGAGTTCGCCCGGGACCTCCTCCCTACCCTCTTCAAGCACAGCAACTTCTCCAGTTTCGTCCGCCAACTTAATACTTATGGGTTTAGGAAAGTGGCAACAAGCCGATGGGAATTCTGTAATGACATGTTCCGGAAGGGTGAGAGGGAGTTGTTATGCCAAATCCGTAGGAGAAAAGCATGGTCCAAATCAAATGCTCAAACCCAACAAGTTGATGAAGATCAAAGATCATCATCGACCTCGACCTCGTCGGAACACACCACCTTGGTCGACGAGAACCGACGGCTCAAGGAGGAGAACGGGGTGCTGAGCTCGGAGCTC…
HpHSF06	HperS245g0169	Protein	MDVQMGNNNNEGLLEYVRKSSPPPFLLKTYMLVEDPATDEVISWNGDGTGFVVWQPAEFARDLLPTLFKHSNFSSFVRQLNTYGFRKVATSRWEFCNDMFRKGERELLCQIRRRKAWSKSNAQTQQVDEDQRSSSTSTSSEHTTLVDENRRLKEENGVLSSELTSMKRKCKELLGLVSRYAHLEKGDEEGPKLFGVVLEVEGDREKKRKRAEISESASVLLSQSCN*
		CDS	ATGGATGTTCAGATGGGTAATAATAACAACGAGGGGTTACTGGAATACGTGAGGAAATCGAGCCCGCCGCCGTTTCTGTTGAAGACGTACATGCTGGTGGAGGATCCGGCGACCGACGAGGTGATCTCGTGGAACGGCGACGGGACAGGGTTCGTCGTCTGGCAGCCGGCCGAGTTCGCCCGGGACCTCCTCCCTACCCTCTTCAAGCACAGCAACTTCTCCAGTTTCGTCCGCCAACTTAATACTTATGGGTTTAGGAAAGTGGCAACAAGCCGATGGGAGTTCTGTAATGACATGTTCCGGAAGGGTGAGAGGGAGTTGTTATGCCAAATCCGTAGGAGAAAAGCATGGTCCAAATCAAATGCTCAAACCCAACAAGTTGATGAAGATCAAAGATCA…
HpHSF07	HperS025g0041	Protein	MENTNPGGGVGPAPFLLKTYEMVDDSSTDDIVAWSSSNTSFIVWNPPEFARILLPTYFKHNNFSSFIRQLNTYGFRKIDSERWEFANEEFIRDQKHLLKNIHRRKPIHSHSQPQGSFIDSERAALEEQIEKLAREKASLQSKVIGSEQQRSAAKHQLEDLAERVNSMAQRQDTLFLFLEKAVQDPAFVEHLASRIESMDFSAYNKKRRIPRDDDYRPVVGSTFLDNQTASRLEFGNVIPDFSNRLRLELSPSCDINLLSRSTQSSAEDGTSSPPGKVLEGEPKGAATGESCTVVLGHHLLFVPETLELSDTGASCPVIADVPLQKKLSGTEDSGLNFLASNVMCNEEDDLMSCHLNLTLASSTLQVDQSPLVDRPPQPVQDIHTSPDSGSSKERDPEHR…
		CDS	ATGGAAAACACCAATCCTGGGGGAGGAGTAGGGCCAGCGCCGTTCTTGCTGAAGACGTATGAAATGGTGGATGATTCATCCACGGATGATATTGTGGCGTGGAGCTCGAGCAATACAAGCTTCATCGTTTGGAACCCTCCGGAGTTTGCTAGGATCCTTCTTCCAACTTATTTCAAGCACAACAACTTCTCTAGCTTCATCAGGCAATTAAATACTTATGGATTCAGAAAAATTGATTCCGAGAGATGGGAATTCGCAAATGAAGAATTTATCAGAGATCAGAAGCATCTTCTGAAAAATATCCACCGACGGAAGCCTATCCATAGTCATAGTCAGCCTCAAGGTTCTTTTATAGATTCGGAAAGAGCAGCATTGGAGGAGCAAATAGAGAAGCTTGCT…
HpHSF08	HperS254g0338	Protein	MEGLINSSINYNNIHNNNLIISGATNNNNMNNVHSSCSNIISPFVMKTYQMVNDPATDGLIAWGKDSNSFIVVDPLEFSRQILPIYFKHNNFSSFVRQLNTYGFKKVDPDRWEFASEWFLRGQKQLLRNITRRKQAKQQQQTASSSSSSSYSKLEEVDEEELMMEIARLREEQVALEKELESMSKRLEATERRPQQMMAFLCKVIEDPDLLPRMVLEKDMARRRVSGGDNKRKVAGVSNISAPSHSSSSGFGNSSNSIKSEEEDDGIGGAVLYPVRRAQSFGLDMETWNSQSAPEARWPRLQQHHQPQQFCYSYNSGSADVGGAGSSYENIVTVAEPPPGGGDRGGYRGDTVAGAEGEWPLPPYPFSMLGGGFSYY*
		CDS	ATGGAAGGTCTAATAAACTCCTCCATTAATTACAACAACATCCACAACAATAATCTTATTATTTCCGGTGCTACCAATAATAATAATATGAATAATGTCCATAGCAGCTGTAGTAACATTATTTCCCCCTTCGTTATGAAAACCTACCAGATGGTCAACGACCCGGCCACCGACGGGCTCATCGCTTGGGGTAAGGACAGTAACAGCTTCATCGTCGTCGACCCTCTCGAATTCTCCCGACAGATTCTGCCTATCTACTTCAAGCACAACAACTTTTCCAGCTTCGTCCGACAATTGAATACCTATGGTTTCAAGAAGGTGGATCCGGACAGGTGGGAGTTCGCGAGCGAGTGGTTCCTGAGAGGGCAGAAGCAACTGCTTAGGAACATAACGAGGAGG…
HpHSF09	HperS338g0001	Protein	MANVHGSGNDTVAPFVMKTYQMVNDPATDRLISWGKADNSFFVVDPLDFSHRILPIYFKHNNFSSFVRQLNTYGFKKVDPDRWEFASEWFLRGQKQLLSNITRRKHARQQASSNGTVVPPGSWGKVEDMDEEEMAMEIAQLRREQVAMEKELEGMNKRLEATERRPQQMMAFLCKVVEDPDLLPRMVLEKDKAKRLVSGGDKKRRVSNTSAASNSSSSGFGNSSSSIKSEEEDGFGGAVSYHVQDFGLDTETFGGYSPPGQQQLCYNYSRGFDGDGSSIGNIVTVAAVPPGDGDRGDYIGYRGEKMAGVEGGSPLPPYPFSLLGGGFSYY*
		CDS	ATGGCTAATGTCCATGGCAGTGGTAATGATACTGTAGCCCCGTTCGTCATGAAAACCTATCAGATGGTCAACGACCCGGCAACGGACAGGCTCATCTCTTGGGGCAAGGCCGACAACAGCTTCTTCGTTGTCGACCCTCTCGATTTTTCCCACCGGATTTTACCCATTTACTTCAAGCACAACAACTTCTCCAGCTTCGTCCGCCAATTGAATACTTATGGTTTCAAGAAGGTGGATCCAGATAGGTGGGAGTTTGCGAGCGAGTGGTTCCTGAGAGGGCAGAAGCAACTGCTCAGTAACATAACGAGGAGGAAGCACGCGAGGCAGCAGGCGTCGAGCAACGGAACGGTCGTTCCTCCGGGGAGCTGGGGGAAGGTGGAGGACATGGACGAGGAGGAG…
HpHSF10	HperS346g0011	Protein	MFPPEESPVPRPIEWPTVPPFLSKTYDLVEESGLDAVLSWGPTGESFVVWDPFEFSRSVLPFHFKHNNFSSFVRQLNTYGFRKIDADKWEFANESFRRGQKHLLKNIQRRKSPQSQPVGVQAAGPSLETGISGLEGEVERLKKDRSRMMEEVVELRQQQRGTVQHVGEANRRLRAAEQKQKQMLSFLSKLFQNPEFLARLRQQKEQGLIGSPRMKRKFISHQTHGAGQTGPSLEDNVVPEANYLHVEPTTDYVLQDVGPGAGDVPFQINDIAFQDLAVSDELAKAQGLISTTELAGEGTSSFGREDWHLKGKSIAIPEQEINTEYSLSFPEEFSGKEFLEFQSPELESMVKQEDLWNLGLDDQTGMSSSTGEPFNYGLPEFGSTAFSDIWDMGSVQEAG…
		CDS	ATGTTCCCACCGGAGGAGTCGCCGGTGCCGCGGCCGATAGAGTGGCCGACGGTGCCTCCGTTCCTGTCGAAGACGTACGACCTGGTGGAGGAGTCGGGGCTGGACGCGGTACTGTCGTGGGGACCAACCGGGGAGAGCTTCGTGGTGTGGGACCCATTCGAGTTCTCTAGGTCCGTCCTCCCATTCCACTTCAAGCACAACAACTTCTCCAGCTTCGTCCGCCAGCTCAATACTTACGGGTTCCGCAAGATTGACGCTGATAAGTGGGAGTTTGCGAATGAGTCTTTCCGGAGAGGCCAGAAGCATCTGTTGAAGAACATCCAGAGGCGAAAGTCGCCCCAATCCCAGCCGGTCGGTGTGCAGGCTGCTGGGCCTTCTCTTGAAACAGGGATTTCCGGG…
HpHSF11	HperS346g0247	Protein	MENNKQEKSSSSSSPAPFLVKTYEMVDDYSTDHIVSWSSSGCSFVVWDPPEFSQDLLPKYFKHNNFSSFVRQLNTYGFRKADPDLWEFANPEFVKGQRHMLINIHRRKPIHSHSSNGNGSVMTETERFQYKETIRRLEREKNSLQLELQRQDKERQQLELESSSLGHQLRGMETRQMQLMSFLDQLVQNPGFVHNKKRRFMEVDQLLEVNPYDPSTINYFEVVEKLDSSLAQWESFFNEDLAAHFGTKRFTTTREASVASSDSSPELVKCFREIPPPLPGSNQSSEAKRNLDSDAKSSNELMGVNDHFWQHFLTEAPGSTRTAC*
		CDS	ATGGAGAATAACAAACAAGAAAAGAGCTCCTCCTCATCCTCGCCCGCGCCATTCCTGGTCAAGACGTATGAAATGGTCGACGATTACTCGACCGATCACATCGTGTCGTGGAGCTCGAGCGGCTGCAGCTTCGTCGTATGGGACCCGCCCGAGTTCTCCCAGGATTTGCTTCCCAAGTACTTCAAGCACAATAACTTCTCCAGCTTCGTCAGGCAGCTTAACACCTACGGGTTTAGGAAGGCTGATCCGGACCTGTGGGAATTCGCCAACCCGGAGTTCGTTAAGGGGCAGAGACATATGCTCATCAACATCCACAGGAGGAAGCCGATCCACAGCCATTCCTCCAACGGGAATGGCTCCGTGATGACCGAAACAGAGAGGTTCCAATACAAGGAGACG…
HpHSF12	HperS362g0014	Protein	MDESHGGASSLPPFLTKTYEMVEDPSCDPVVSWSQGNKSFIVWNPPEFARDLLPRFFKHNNFSSFIRQLNTYGFRKIDPEQWEFANEDFIRGQPHLMKNIHRRKPVHSHSVQSIHGQGGSLLSDQERQSLKDEIERLTHDKEALGLELKRFEDERKGYEKQMDTLKEKLQQMEQKQQAMVSFVACVLQKPGLALNLMPQMEGHDRKRRMLTIDYPFSSDEPCIDDSRIVASQAPDRENIEGNSVASSSVEHNALESSLSFWENIVDDISGGSPNQPNSHMDLEESNSCCLDSPDASSIQVNVDLRPKSPGIDMNVEPVVASAPEPVPSEDQAIVTAPTVVTGVNDVFWEQFLTENPGSADMHEVQSGKKDSDGKKNDIKPSDRGKFWWNMRSVNNLAEQ…
		CDS	ATGGACGAGTCTCATGGGGGTGCTAGCTCCCTACCGCCTTTCCTTACGAAGACTTACGAGATGGTGGAGGATCCTTCCTGCGATCCGGTTGTGTCGTGGAGCCAGGGCAACAAGAGCTTCATAGTTTGGAACCCACCCGAGTTTGCTAGGGACTTGCTGCCACGGTTCTTTAAGCACAACAACTTCTCGAGCTTTATCCGGCAGCTCAATACATATGGGTTTAGGAAGATTGATCCCGAACAATGGGAGTTTGCGAATGAGGATTTCATCAGGGGTCAACCCCATCTCATGAAGAACATTCATAGAAGGAAGCCGGTTCATAGTCATTCCGTGCAGAGTATCCATGGTCAGGGAGGTAGTTTGCTGTCTGACCAAGAAAGGCAGAGCTTGAAGGATGAG…
HpHSF13	HperS388g0082	Protein	MVKSSGVRDKESSSWSSVAPFLKKCYEMVDDSSTDAVISWSGDDSSSFVIWDSTEFSVRLLPLYFKHSNFSSFIRQLNIYGFRKIDADRWEFANDGFVRDKKELLKTIVRRKNPQGIDNQKSVEENSNSVEHSDRVKAGHLREEVEILKTDKNALMQELKKLMQHQEIADNNLLLLTKRMQGMEKNQQQMLSFLVMVMQNPSFLAQLLQPKENNWRMAEPGSITEQWTDDREPFRTDGTIVRYQPPTSEMASAANSRATTPQNPSDATPAVDGMKDVFLNPDFVKVLMDDHFPSLENHAPFILPELSDDRAWEQLLLRSPFLENIEDTKQHGKEPKHGQNESECMDDDCHDFDFFTEELENSRDSEENTMDPEAWFKSSQSMEMLTKQLDLLASETSQM…
		CDS	ATGGTAAAGTCAAGCGGCGTCAGGGACAAGGAGTCGTCATCGTGGTCGTCGGTGGCCCCGTTCCTGAAGAAATGCTACGAGATGGTGGACGACAGCTCCACGGACGCCGTAATCTCGTGGTCGGGAGACGACAGCAGCAGCTTCGTCATCTGGGACAGCACCGAGTTCTCTGTCCGCCTCCTCCCCCTGTACTTCAAACACAGCAACTTCTCCAGCTTTATCAGGCAGCTCAACATATATGGGTTTCGGAAGATTGATGCAGATCGTTGGGAGTTTGCAAATGATGGATTCGTCAGAGATAAAAAGGAGTTGTTAAAAACAATTGTTAGAAGGAAAAACCCTCAGGGAATAGACAACCAAAAGTCGGTGGAAGAGAATAGTAACTCGGTGGAGCATTCT…
HpHSF14	HperS398g0019	Protein	MEEASSQSQRAAKSPAPFLAKTYDILEEGDRGGGDGNRRIVSWNEDGDGFVVWSPADFSELMLPRYFKHNNFSSFVRQLNTYGFKKTSSKRWEFKHLKFQRGSRHMLAEITRRKCDSTGAFPSFLRASKECSDPMSSTSSLEESNRQLLMEENKSLKREKLELEMQIAQVKALETKLLDCLAHHTSNQACPQKYN*
		CDS	ATGGAAGAAGCTTCGAGTCAGTCTCAAAGAGCAGCGAAGAGCCCTGCTCCTTTCTTGGCGAAGACTTACGATATACTGGAAGAAGGTGACCGAGGAGGAGGCGACGGCAATCGGAGAATTGTGTCGTGGAATGAGGACGGAGATGGGTTCGTGGTGTGGTCACCGGCCGATTTCTCGGAGCTGATGTTGCCTAGGTACTTCAAGCACAACAACTTCTCTAGTTTCGTCCGCCAGCTTAACACCTACGGATTCAAGAAAACCTCCTCCAAGAGATGGGAATTCAAGCATTTGAAGTTCCAAAGAGGAAGCAGGCACATGCTGGCTGAGATCACCAGGAGGAAATGTGACTCAACTGGTGCTTTCCCATCTTTCCTTAGGGCTTCCAAGGAATGCAGTGAT…
HpHSF15	HperS042g0257	Protein	MAQRSVPAPFLSKTYQMVEDPSTDDVISWNDDGTTFVVWKTADFAKDLLPKSFKHNNFSSFVRQLNTYGFRKTVPDKWEFANDNFKRGNKELLSEIRRRKTVVAKPGAMAAGQTTSNSGEDMASTSTSSPDSKNPGSVETAPSQLVEENERLRKDNESLSSELARAKKQCDELVAFLRHCKVGSDQINRIMMMQSIEDDDENEGSTNNNKEESDDGCLKLFGVVLKKRARDGEDGLRGPHSKEIKICI*
		CDS	ATGGCTCAGAGGTCGGTGCCGGCGCCGTTTCTGTCGAAGACGTATCAGATGGTGGAGGATCCGAGCACCGACGACGTGATCTCGTGGAACGACGACGGGACGACGTTCGTCGTCTGGAAGACGGCCGATTTCGCTAAGGATCTTCTCCCCAAGTCGTTCAAACACAATAACTTCTCCAGCTTTGTCCGGCAGCTCAATACCTACGGGTTCCGAAAGACCGTCCCGGACAAATGGGAGTTCGCGAACGACAACTTCAAGAGGGGCAACAAGGAGCTCCTCTCGGAGATCCGCCGCCGGAAGACTGTCGTAGCCAAGCCGGGCGCTATGGCTGCGGGGCAGACAACGTCGAACTCCGGGGAGGATATGGCGTCAACGTCGACTTCGTCCCCGGACTCGAAG…
HpHSF16	HperS434g0151	Protein	MEGDASTSGAAPVPITAAQTANAPPPFLSKTYDMVDDPATDAVVSWSATNNSFVVWNPPEFARDLLPKYFKHNNFSSFVRQLNTYGFRKVDPDKWEFANEGFLRGQKHLLKSISRRKPAHGQSHQQQQPTHGQNRSMGVSACVEVGKFGLEEEVERLKRDKNVLMQELVRLRQQQQTTDSQLQTMVQRLQGMEQRQQQMMSFLAKAMQSPGFLAQFVQQQNENRRLTEANNKKRRIRQEGVSENEHPNSPDGQIVKYQPQINEAAKAMLRQIMKMDASSRQDSSNNKLDAFLLGDGSPASSALDGGSSSSRISGVTLQEVLPTSGQPTFTPAASGVSGHDTAAVMSELQSCPCIPGSEKVTTPEFDMSMLLAPSSISAPQGDVIPPQAGNLVNIPSEDL…
		CDS	ATGGAGGGAGACGCGTCGACGAGCGGGGCGGCGCCGGTACCGATTACGGCGGCTCAGACGGCCAACGCGCCGCCTCCGTTCCTCAGCAAAACGTACGACATGGTGGACGACCCGGCCACCGACGCTGTGGTTTCGTGGAGCGCCACCAACAACAGCTTCGTGGTTTGGAACCCGCCGGAGTTCGCGCGCGACCTCCTCCCCAAGTACTTCAAGCACAACAATTTCTCCAGCTTCGTCCGCCAGCTTAACACTTACGGTTTCAGGAAGGTTGACCCTGACAAATGGGAATTTGCTAACGAGGGATTTCTGAGGGGTCAGAAGCACTTGTTAAAGAGTATAAGCCGGAGAAAGCCTGCTCATGGACAGAGCCATCAACAACAGCAACCAACACATGGACAG…
HpHSF17	HperS044g0424	Protein	MDSSSVPPFLTKTYEMVDDRSSDDVVAWSHGNNSFVVSDLGRFQTELLPKYFKHGNFASFVRQLNTYGFRKVNSDRLEFANEAFLRGEKHLLKTISRRKHGSHPPQVQSSQAAACIEVGKLGIKEEVEILQRDKNILMQELVRLRQQQQATDHQLETVGQHMQMMEQRQQQMMSFLAKAMQSPGFLGQLVQKQSDSNRFVVARGTKKRRFSRQDELNSVGDNVNGSSNRQIVKLHPSMDEAAKAMLHQILKMNSCRRDPVMTNSGPFLLGNLPCNSLESCSSASRITEVALPDDLLSCGKSPVHVDPGFHGNLVDDDMQLAPSVVTDQLEQNHLTELNPQMCGQGESGPNFTEMPGNVTESFSGIPTAIPLGSEISNQDFINQLPSTLNMTMPEQSDPQ…
		CDS	ATGGATTCTTCCTCGGTGCCGCCGTTCCTGACCAAGACCTACGAGATGGTGGACGACCGGTCGTCCGACGACGTGGTGGCGTGGAGCCACGGCAACAACAGCTTCGTCGTCTCCGACCTCGGGCGGTTCCAGACCGAGCTTCTCCCCAAGTACTTCAAGCACGGAAACTTCGCCAGCTTCGTCCGCCAGTTGAACACTTACGGTTTTAGGAAAGTGAACTCTGACCGCTTGGAATTTGCGAATGAGGCTTTCTTGAGAGGGGAAAAGCATCTGCTGAAGACTATATCAAGAAGAAAGCATGGCAGTCATCCTCCTCAAGTTCAGAGCTCACAAGCTGCAGCATGCATCGAAGTGGGGAAGTTGGGGATCAAGGAAGAGGTTGAAATACTACAACGTGAT…
HpHSF18	HperS443g0073	Protein	MAESHGGSTSLPPFLAKTYDMVDDPSSDGVVSWSQSDKSFIVWDPLEFARVLLPRFFKHNNFSSFIRQLNTYGFRKIDPEQWEFANDDFIRGQPHLMKNIYRRKPVHSHSTQNIHSQGGSSLSDQERQSLKDEIERLTHDKEALGSELQLYEDERKGYEKQMDMLKEKLQQMEQKQQAMVSFVARVLQKPGLALSLMPQMEGHDRKRRLLTIDYPFSLDEPCVEDRENIEGNSIASSIEEHHVLESSLALWENIVDNIGRGPNQPNPVELEESTSCCLNSPAASPIELNVDVRPKSPSIDMNIEPAIASAPEPVPSEDQAVVTAPTVATGVNDVFWEQFLTENPGSTDAQEVQSERKDSDAKKNNIKPGDNGKFWWNMRSVNNLAEQMGHLTPAERT*
		CDS	ATGGCGGAATCTCATGGGGGTTCTACTTCCCTACCGCCTTTTTTAGCGAAAACTTATGATATGGTGGACGATCCTTCGTCCGATGGGGTAGTGTCGTGGAGCCAGAGCGACAAGAGCTTCATCGTTTGGGATCCGCTCGAGTTCGCTAGGGTTTTGCTGCCGCGGTTCTTTAAGCACAACAATTTCTCGAGTTTTATCCGGCAGCTCAATACTTATGGGTTTCGGAAGATTGATCCCGAGCAATGGGAGTTTGCAAATGATGATTTCATCAGGGGTCAGCCCCATCTCATGAAGAACATTTATAGGAGGAAGCCGGTTCATAGTCATTCCACGCAGAATATCCACAGCCAGGGAGGTAGTTCATTGTCAGACCAGGAAAGGCAGAGCTTGAAGGATGAG…
HpHSF19	HperS006g0172	Protein	MEICGQSQRAAKSPAPFLAKTYDFLEEGDQRIVSWNEEGDGFVVWSTADFSELMLPKYFKHNNFSSFVRQLNTYGFKKTSSKRWEFKHEKFQKGSRHMLAEITRKKCDHSSAFPPFLKASKECSDPTSSSSSMEENNNRMMLMEENKSLRREKLELEMQIAQVKSLETKLLDCLAHHSGNQTCPSKLN*
		CDS	ATGGAAATCTGCGGCCAGTCTCAGAGAGCAGCCAAGAGCCCAGCTCCTTTCTTGGCCAAGACATACGATTTCTTGGAAGAAGGTGATCAGAGAATTGTGTCTTGGAATGAAGAGGGAGATGGGTTCGTGGTTTGGTCAACGGCTGATTTCTCCGAGCTAATGTTGCCTAAGTACTTCAAGCACAACAACTTCTCTAGCTTCGTTCGCCAGCTTAACACCTATGGGTTCAAGAAAACTTCCTCAAAGAGATGGGAATTCAAGCATGAGAAGTTTCAAAAAGGTAGCAGGCACATGCTGGCCGAGATCACAAGGAAAAAATGCGACCATAGTAGTGCTTTCCCACCTTTTCTCAAGGCTTCCAAGGAATGCAGTGATCCAACGAGCTCTAGCTCCTCAATG…
HpHSF20	HperS064g0032	Protein	MFPPTHKSDFEAPPSPPRPLECLAPGSPMVPPFLSKTYDLVEDPALDGVLSWGRRGELRGLGPTRVLQVRPPPLLQAQQLLQLRPPAQHLPQLLMRYLPTYLYNRQRRDECFLPLVQGFRKIDTDKWEFANESFKRGKKQLLKNIQRRKSPQSQPVGLLARPSFQAGKFGLEGDVEMLRKERSQMMEQVVELQQQQHGTVRHVGEVNQRLRGAEQKQKQMLSFLFKLFQNQEFLARLSGQKEQGLVGLPRMKRRFVSHRAQGAGPIDMSMEEKIVKCEPKSAVPEVNSAHMVPTDHILQDIGQDAGEMPFQVDHIAHRESTALDKLETAREFIGAVEPVGEKAYTLGREDRHSKGKNIATPEQEMDPEYFVSFPKEFAGKKEFLEFPSPDLERMVEQED…
		CDS	ATGTTCCCACCGACGCACAAATCTGACTTCGAGGCTCCTCCATCGCCGCCGCGGCCATTGGAGTGCCTGGCTCCGGGGAGCCCGATGGTGCCGCCGTTCCTCTCGAAGACGTACGACCTGGTGGAGGACCCCGCGCTCGACGGGGTTCTGTCGTGGGGGCGGCGGGGAGAGCTTCGTGGTTTGGGACCAACTAGAGTTCTCCAGGTCCGTCCTCCCCCGCTACTTCAAGCACAACAACTTCTCCAGCTTCGTCCGCCAGCTCAACACTTACCTCAGCTTTTGATGAGGTACCTACCTACCTACCTGTATAACCGCCAGAGAAGAGATGAGTGCTTCCTTCCCCTCGTGCAGGGATTTCGCAAGATTGACACTGATAAGTGGGAGTTCGCAAATGAATCT…
HpHSF21	HperS068g0017	Protein	METGKSDGGGGASAIAPPPFLSKTYDMVDDPATDAVVSWSAANNSFVVWNPPEFARDLLPKYFKHNNFSSFVRQLNTYGFRKVDPDKWEFANEGFLRGQKHLLKSINRRKPAHGHIHQQQQPAHGQSTSVGASACVEVGKFGLEEEVERLKRDKNVLMQELVRLRQQQQTTDNQLQTMVQRLQGMEQRQQQMMSFLAKAMQSPGFFSQFVQQNENKRITEANNKKRRIIQEGVSENEHPNSPDGQIVKYQPQINEAAKAMLRQIMKMDASSRLDSSNNKLDAFLLHDGSPASSGLDDGNSSSRISGVTLQEVPPTSGQSTYTPTVSNVPGHNTATTMSETQSCPRIVDSEKVTASEFDMGILLVDAPSTSVPRDNVILPQVPGNLVNMPAEDLMESQAN…
		CDS	ATGGAGACTGGCAAAAGCGACGGCGGCGGCGGCGCGTCTGCGATTGCGCCGCCGCCGTTCCTCAGTAAGACGTATGACATGGTGGACGATCCGGCGACCGACGCGGTGGTTTCTTGGAGCGCCGCCAACAACAGCTTCGTGGTGTGGAACCCACCGGAGTTCGCGCGGGACCTCCTCCCCAAGTACTTCAAGCACAACAACTTCTCCAGCTTCGTCCGCCAGCTCAACACTTACGGTTTCAGGAAGGTTGATCCTGACAAATGGGAGTTTGCTAACGAGGGGTTTCTGAGGGGTCAAAAGCACCTATTGAAGAGTATAAACAGGAGAAAGCCTGCACATGGACACATCCATCAACAACAGCAACCAGCACATGGACAAAGCACGTCCGTGGGTGCGAGT…
HpHSF22	HperS079g0626	Protein	MVFCVESQKAVPAPFLTKTYQLVDDPLTDHIVSWGDDEATFIVWRPPEFARDLLPNYFKHCNFSSFVRQLNTYGFKKVVADRWEFANDYFRKGAKQLLSEIHRRKSHNHHHQHQPHHQQNQSEYNFQDQFPSSQFFIQPEEHTYSWNNNNNNNNNNNIDHPQFFSPKQASPVRSDTLAALSEDNERLRKKNYVLLSELSHMKTLYNDIIYFIQNHAKPVDKLIEYGPSCGNIYDQDQVGFVADDDDGEPNGHNFVKLFGVPLIGKKRVHP*
		CDS	ATGGTATTCTGTGTGGAGTCACAAAAGGCGGTACCGGCGCCGTTCCTAACCAAGACTTACCAGCTGGTCGATGACCCTCTAACCGATCACATAGTGTCTTGGGGCGACGACGAGGCCACCTTCATCGTGTGGAGGCCGCCGGAGTTCGCGAGGGACCTTCTTCCTAACTACTTCAAGCACTGCAACTTCTCTAGCTTCGTCAGGCAGCTCAATACTTACGGATTTAAAAAGGTGGTTGCAGATAGATGGGAATTTGCAAATGACTACTTCAGGAAAGGAGCAAAACAATTGCTATCAGAAATCCACAGGAGAAAAAGCCATAACCATCATCACCAACATCAACCACATCATCAACAAAACCAATCAGAATATAATTTCCAAGACCAATTTCCTTCATCC…
HpHSF23	HperS091g0277	Protein	MNHRGAVKQEYHHHVAAASSSSGIPQPMEGLHDAGPPPFLTKTYEIVEDPTTDHMVSWSRGNNSFIVWDPQAFSISLLPRYFKHSNFSSFVRQLNTYGFRKVDPDRWEFSNEGFLRGQRHLLKSIRRRRTVPQPQSSQQSQDHCVEVGRFGLDEEVDRLRRDKQLLMMELVKLRQQQQTTKACLQMMEQRLKRTEAKQQQMMSFLAKAMKNPMFLENLALQKNRRKELQEAINKKRRRHIDQPGCNAEVERFGHGSEGSSLEANFVKVELQDFGDLPDVFELDELQLGNLEEVLQEDRFGEEQGGIIGGTALEDGLWDGLLYDDHNVGEEVGIWGGGDEDEEGMDSLVEQLGYLGYGPNQGNY*
		CDS	ATGAATCATAGAGGGGCAGTGAAGCAAGAGTACCATCACCATGTGGCTGCTGCTTCATCTTCTTCCGGTATCCCTCAACCAATGGAGGGCCTCCACGACGCCGGGCCGCCTCCATTCCTGACCAAGACCTATGAGATTGTGGAGGACCCAACCACAGACCACATGGTTTCTTGGAGCAGAGGTAACAACAGCTTCATTGTGTGGGACCCACAGGCCTTCTCAATCAGCCTCCTCCCCAGGTACTTCAAGCACAGCAACTTCTCAAGCTTTGTCAGGCAGCTCAATACTTATGGGTTTAGAAAGGTTGATCCAGATAGATGGGAGTTTTCGAATGAAGGGTTTCTTAGAGGGCAAAGACACCTCCTAAAGAGCATCAGAAGGAGAAGAACAGTACCTCAA…
