# Supplementary material for: Genome-wide identification, classification and expression profile analysis of the HSF gene family in Hypericum perforatum
Source: PeerJ. 2021 May 6;9:e11345. doi: 10.7717/peerj.11345 (PMC8106910; doi:10.7717/peerj.11345)
Supplement: Supplemental Information 4 — qRT-PCR data was normalized using Hypericum perforatum Actin 2 gene and are shown relative to 0 h. The experimental and technical repetitions are 3, and some unreasonable data are eliminated. A total of 23 HpHSF genes showed distinct expression patterns during heat treatment. [file peerj-09-11345-s004.xlsx]

## Sheet: Sheet1
	HSF01	Average	ACT2	Average	△Ct	△Ct(Average)	△△Ct	2^-△△Ct		HSF02	Average	ACT2	Average	△Ct	△Ct(Average)	△△Ct	2^-△△Ct		HSF03	Average	ACT2	Average	△Ct	△Ct(Average)	△△Ct	2^-△△Ct		HSF04	Average	ACT2	Average	△Ct	△Ct(Average)	△△Ct	2^-△△Ct		HSF05	Average	ACT2	Average	△Ct	△Ct(Average)	△△Ct	2^-△△Ct		HSF06	Average	ACT2	Average
0h-1	31.84	31.9933	30.21	30.1	1.89333	1.7	0.193333	0.874583	0h-1	31.55	31.53	30.99	29.87	1.66	2.56111	-0.901111	1.8675	0h-1	33.81	33.8733	30.43	30.4833	3.39	3.24222	0.147778	0.90264	0h-1	34.67	34.6433	28.4	28.4767	6.16667	4.96444	1.20222	0.434605	0h-1	34.05	33.5033	29.49	28.96	4.54333	4.42	0.123333	0.918064	0h-1	34.81	35.01	24.47	28.7467
	31.77		29.99			1.7				31.85		31.31							33.6		30.4							35.83		25.87							34.04		30.19							35.2		30.62
	32.37		30.1			1.7				31.19		27.31							34.21		30.62							33.43		31.16							32.42		27.2							35.02		31.15
0h-2	31.21	30.94	29.67	29.73	1.21	1.7	-0.49	1.40444	0h-2	32.92	32.8333	30.28	30.33	2.50333	2.5611	-0.0577667	1.04085	0h-2	35.16	34.4167	30.4	30.5533	3.86333	3.2422	0.621133	0.65016	0h-2	34.71	34.0467	28.98	29.8333	4.21333	4.9644	-0.751067	1.68304	0h-2	32.75	33.16	27.02	29.0067	4.15333	4.42	-0.266667	1.20303	0h-2	35	34.4967	30.63	30.5533
	31.15		29.58			1.7				32.98		30.64							33.83		30.54							34.14		29.9							33.56		30.09							34.01		30.5
	30.46		29.94			1.7				32.6		30.07							34.26		30.72							33.29		30.62							33.17		29.91							34.48		30.53
0h-3	28.26	28.4	26.51	26.4033	1.99667	1.7	0.296667	0.814131	0h-3	30.69	30.9267	27.41	27.4067	3.52	2.5611	0.9589	0.514449	0h-3	29.85	29.86	27.39	27.3867	2.47333	3.2422	-0.768867	1.70393	0h-3	31.95	31.9867	27.31	27.4733	4.51333	4.9644	-0.451067	1.36705	0h-3	31.47	31.0067	27.08	26.4433	4.56333	4.42	0.143333	0.905425	0h-3	32.31	32.01	27.34	26.9967
	28.5		26.08			1.7				30.98		27.47							29.71		27.35							32.18		27.58							30.83		27.51							31.63		26.28
	28.44		26.62			1.7				31.11		27.34							30.02		27.42							31.83		27.53							30.72		24.74							32.09		27.37
1h-1	25.59	25.56	27.54	27.4933	-1.93333	1.7	-3.63333	12.4092	1h-1	31.1	30.83	28.35	28.3867	2.44333	2.5611	-0.117767	1.08505	1h-1	34.58	34.6633	27.11	27.83	6.83333	3.2422	3.59113	0.0829777	1h-1	30.39	30.3633	28.3	27.38	2.98333	4.9644	-1.98107	3.94785	1h-1	34.39	34.0633	28.26	28.16	5.90333	4.42	1.48333	0.357661	1h-1	34.9	34.7767	28.44	28.1267
	25.5		27.33			1.7				30.76		28.33							32.23		28.28							30.45		25.39							33.9		28.01							35.06		27.61
	25.59		27.61			1.7				30.63		28.48							37.18		28.1							30.25		28.45							33.9		28.21							34.37		28.33
1h-2	24.71	24.7167	26.16	26.18	-1.46333	1.7	-3.16333	8.95897	1h-2	30.04	29.9267	26.98	26.9833	2.94333	2.5611	0.382233	0.767249	1h-2	32.94	32.7367	26.96	26.9367	5.8	3.2422	2.5578	0.169834	1h-2	29.94	30.1167	26.93	26.92	3.19667	4.9644	-1.76773	3.40519	1h-2	34.03	34.1467	27.1	26.9667	7.18	4.42	2.76	0.147624	1h-2	35.03	34.57	27.06	27.02
	24.71		26.16			1.7				29.71		26.98							32.76		26.85							30.22		26.92							34.26		26.89							34.66		27.12
	24.73		26.22			1.7				30.03		26.99							32.51		27							30.19		26.91							34.15		26.91							34.02		26.88
1h-3	32.04	31.39	32.94	32.57	-1.18	1.7	-2.88	7.3615	1h-3	35.11	34.2967	33.46	33.1833	1.11333	2.5611	-1.44777	2.72785	1h-3	38.8	36.6233	29.68	30.0867	6.53667	3.2422	3.29447	0.101922	1h-3	36.62	36.3	26.68	30.7433	5.55667	4.9644	0.592267	0.6633	1h-3	36.8	36.5133	31.64	32.17	4.34333	4.42	-0.0766667	1.05458	1h-3	37.95	39.3533	31.48	30.67
	30.92		32.46			1.7				34.41		33.26							36.7		32.79							35.42		32.67							35.46		32.43							43.51		33.14
	31.21		32.31			1.7				33.37		32.83							34.37		27.79							36.86		32.88							37.28		32.44							36.6		27.39
3h-1	25.57	25.5767	28.84	28.4067	-2.83	1.7	-4.53	23.1029	3h-1	32.73	33.4833	29.14	29.24	4.24333	2.5611	1.68223	0.3116	3h-1	35.61	36.1067	29.26	29.2367	6.87	3.2422	3.6278	0.0808953	3h-1	33.15	33.1133	29.5	29.3633	3.75	4.9644	-1.2144	2.32044	3h-1	33.17	33.17	29.18	28.9167	4.25333	4.42	-0.166667	1.12246	3h-1	33.12	33.8867	27.36	27.01
	25.56		28.25			1.7				32.85		29.29							32.54		29.24							32.92		29.37							33.08		28.21							33.93		27.14
	25.6		28.13			1.7				34.87		29.29							40.17		29.21							33.27		29.22							33.26		29.36							34.61		26.53
3h-2	25.45	25.41	28.63	28.5233	-3.11333	1.7	-4.81333	28.1163	3h-2	32.39	32.23	29.44	29.4433	2.78667	2.5611	0.225567	0.855259	3h-2	35.49	34.15	29.14	29.16	4.99	3.2422	1.7478	0.297755	3h-2	33.22	32.8533	29.2	29.33	3.52333	4.9644	-1.44107	2.71522	3h-2	32.02	32.0533	29.35	29.2833	2.77	4.42	-1.65	3.13834	3h-2	33.27	32.9733	29.33	29.2633
	25.38		28.46			1.7				32.47		29.54							32.88		29.38							32.52		29.29							31.55		29.18							32.52		29.22
	25.4		28.48			1.7				31.83		29.35							34.08		28.96							32.82		29.5							32.59		29.32							33.13		29.24
3h-3	24.61	24.6	27.69	28.14	-3.54	1.7	-5.24	37.7918	3h-3	30.96	31.1567	28.61	28.8867	2.27	2.5611	-0.2911	1.22357	3h-3	33.43	33.3433	28.15	28.5767	4.76667	3.2422	1.52447	0.347608	3h-3	31.96	31.7833	28.5	28.7433	3.04	4.9644	-1.9244	3.79579	3h-3	31.43	31.4733	27.52	28.2133	3.26	4.42	-1.16	2.23457	3h-3	32.04	32.0667	27.95	28.35
	24.62		27.72			1.7				31.5		28.52							33.49		28.5							31.66		28.39							31.41		27.72							31.98		27.78
	24.57		29.01			1.7				31.01		29.53							33.11		29.08							31.73		29.34							31.58		29.4							32.18		29.32
6h-1	26.02	26.4433	28.94	28.8533	-2.41	1.7	-4.11	17.2677	6h-1	31.98	32.1533	29.95	30.0567	2.09667	2.5611	-0.464433	1.37978	6h-1	34.57	35.13	29.87	28.2367	6.89333	3.2422	3.65113	0.0795975	6h-1	34.11	34.2467	29.81	29.8567	4.39	4.9644	-0.5744	1.48906	6h-1	37.6	38.1533	30.08	29.9267	8.22667	4.42	3.80667	0.0714627	6h-1	35.76	36.3967	28.32	28.4067
	26.13		28.74			1.7				31.62		30.23							33.22		24.87							34.23		29.8							39.25		29.82							36.31		28.55
	27.18		28.88			1.7				32.86		29.99							37.6		29.97							34.4		29.96							37.61		29.88							37.12		28.35
6h-2	24.79	24.91	27.51	27.45	-2.54	1.7	-4.24	18.8959	6h-2	28.99	28.9467	29.59	29.6233	-0.676667	2.5611	-3.23777	9.43333	6h-2	31.44	31.31	26.35	27.4667	3.84333	3.2422	0.601133	0.659236	6h-2	31.65	31.5333	28.17	28.2567	3.27667	4.9644	-1.68773	3.2215	6h-2	32.68	33.1567	28.16	28.1567	5	4.42	0.58	0.668964	6h-2	33.34	33.25	28.25	28.2333
	24.95		27.37			1.7				29.06		29.44							30.87		28.08							31.55		28.35							33.07		28.1							33.13		28.2
	24.99		27.47			1.7				28.79		29.84							31.62		27.97							31.4		28.25							33.72		28.21							33.28		28.25
6h-3	32.48	32.59	31.58	32.0433	0.546667	1.7	-1.15333	2.22427	6h-3	35.13	36.28	29.85	29.8167	6.46333	2.5611	3.90223	0.0668822	6h-3	36.44	36.485	33.91	33.0833	3.40167	3.2422	0.159467	0.895356	6h-3	42.95	41.1633	29.6	30.6867	10.4767	4.9644	5.51227	0.02191	6h-3	39.19	38.0567	29.22	29.2267	8.83	4.42	4.41	0.047039	6h-3	41.88	41.2267	29.01	32.2
	32.62		34.58			1.7				37.15		29.94							-		34.39							38.33		30.44							36.67		26.59							40.93		33.59
	32.67		29.97			1.7				36.56		29.66							36.53		30.95							42.21		32.02							38.31		31.87							40.87		34
12h-1	25.72	25.7467	28.42	28.4333	-2.68667	1.7	-4.38667	20.9179	12h-1	30.97	31.0133	28.33	28.88	2.13333	2.5611	-0.427767	1.34515	12h-1	30.51	31.6933	29.4	28.6967	2.99667	3.2422	-0.245533	1.18553	12h-1	34.59	33.9167	28.25	29.15	4.76667	4.9644	-0.197733	1.1469	12h-1	33.56	32.9133	29.12	29.1567	3.75667	4.42	-0.663333	1.58374	12h-1	33.92	34.0667	28.67	29.08
	25.77		28.61			1.7				31.28		29.05							32.73		27.96							33.57		29.7							32.35		29.19							33.67		29.35
	25.75		28.27			1.7				30.79		29.26							31.84		28.73							33.59		29.5							32.83		29.16							34.61		29.22
12h-2	26.41	26.41	28.21	28.9167	-2.50667	1.7	-4.20667	18.4643	12h-2	33.01	32.6933	29.75	30.0033	2.69	2.5611	0.1289	0.914528	12h-2	33.42	33.58	29.63	29.87	3.71	3.2422	0.4678	0.723066	12h-2	33.48	34.36	29.83	29.9233	4.43667	4.9644	-0.527733	1.44166	12h-2	33.78	33.65	29.44	29.7133	3.93667	4.42	-0.483333	1.39797	12h-2	34.91	34.6133	29.78	29.89
	26.38		29.31			1.7				32.25		30.15							33.43		30.32							34.25		29.94							34.19		29.42							35.03		29.76
	26.44		29.23			1.7				32.82		30.11							33.89		29.66							35.35		30							32.98		30.28							33.9		30.13
12h-3	27.23	27.2967	28.55	29.71	-2.41333	1.7	-4.11333	17.3076	12h-3	33.85	33.1967	30.79	30.7033	2.49333	2.5611	-0.0677667	1.04809	12h-3	34.68	33.78	30.39	30.65	3.13	3.2422	-0.1122	1.08088	12h-3	34.24	34.8967	30	30.0467	4.85	4.9644	-0.1144	1.08252	12h-3	34.94	34.22	30.14	29.9233	4.29667	4.42	-0.123333	1.08925	12h-3	35.05	35.6167	30.7	30.7567
	27.31		30.35			1.7				33.34		30.33							32.81		30.63							35.24		30.23							34.12		30.05							36.46		30.61
	27.35		30.23			1.7				32.4		30.99							33.85		30.93							35.21		29.91							33.6		29.58							35.34		30.96
[truncated: 157 more columns]

## Sheet: Sheet2
		Sample Name	Gene Name		Cq		Sample Name	Gene Name	Cq
		1h-1	HSF-22		-		1h-1	HSF15	24.22
		1h-1	HSF-22		37.57		1h-1	HSF15	24.3
		1h-1	HSF-22		36.94		1h-1	HSF15	24.43
		1h-1	ACT-2		30.64		3h-1	HSF15	24.29
		1h-1	ACT-2		28.57		3h-1	HSF15	24.31
		1h-1	ACT-2		31.38		3h-1	HSF15	24.33
		3h-1	HSF-22		37.03		1h-1	ACT-2	31.71
		3h-1	HSF-22		34.58		1h-1	ACT-2	30.53
		3h-1	HSF-22		42.86		1h-1	ACT-2	30.86
		3h-1	ACT-2		31.03		3h-1	ACT-2	31.36
		3h-1	ACT-2		29.9		3h-1	ACT-2	31.29
		3h-1	ACT-2		31.12		3h-1	ACT-2	31.09
		1h-2	HSF-22		39.32		1h-2	HSF15	24.48
		1h-2	HSF-22		-		1h-2	HSF15	24.51
		1h-2	HSF-22		35.73		1h-2	HSF15	24.46
		1h-2	ACT-2		29.86		3h-2	HSF15	25.03
		1h-2	ACT-2		28.89		3h-2	HSF15	25.11
		1h-2	ACT-2		30		3h-2	HSF15	24.99
		3h-2	HSF-22		36.53		1h-2	ACT-2	30.97
		3h-2	HSF-22		37.25		1h-2	ACT-2	30.18
		3h-2	HSF-22		34.93		1h-2	ACT-2	30.64
		3h-2	ACT-2		32.29		3h-2	ACT-2	31.72
		3h-2	ACT-2		29.45		3h-2	ACT-2	31.46
		3h-2	ACT-2		31.72		3h-2	ACT-2	31.65
		1h-3	HSF-22		38.98		1h-3	HSF15	25.5
		1h-3	HSF-22		-		1h-3	HSF15	25.03
		1h-3	HSF-22		-		1h-3	HSF15	25.02
		1h-3	ACT-2		34.03		3h-3	HSF15	23.77
		1h-3	ACT-2		32.49		3h-3	HSF15	23.76
		1h-3	ACT-2		31.71		3h-3	HSF15	23.9
		3h-3	HSF-22		35.06		1h-3	ACT-2	32.65
		3h-3	HSF-22		33.87		1h-3	ACT-2	32.58
		3h-3	HSF-22		40		1h-3	ACT-2	32.01
		3h-3	ACT-2		30.06		3h-3	ACT-2	29.67
		3h-3	ACT-2		29.54		3h-3	ACT-2	29.78
		3h-3	ACT-2		30.79		3h-3	ACT-2	30.75
		6h-1	HSF-22		34.5		6h-1	HSF15	23.72
		6h-1	HSF-22		33.83		6h-1	HSF15	23.69
		6h-1	HSF-22		34.52		6h-1	HSF15	24.39
		6h-1	ACT-2		29.62		12h-1	HSF15	27.16
		6h-1	ACT-2		29.21		12h-1	HSF15	27.38
		6h-1	ACT-2		29.85		12h-1	HSF15	27.22
		12h-1	HSF-22		35.09		6h-1	ACT-2	29.57
		12h-1	HSF-22		35.1		6h-1	ACT-2	29.59
		12h-1	HSF-22		36.02		6h-1	ACT-2	29.48
		12h-1	ACT-2		26.26		12h-1	ACT-2	32.37
		12h-1	ACT-2		34.02		12h-1	ACT-2	33.14
		12h-1	ACT-2		29.87		12h-1	ACT-2	33.4
		6h-2	HSF-22		34.82		6h-2	HSF15	26.87
		6h-2	HSF-22		34.16		6h-2	HSF15	27.01
		6h-2	HSF-22		40.58		6h-2	HSF15	27.04
		6h-2	ACT-2		33.13		12h-2	HSF15	25.96
		6h-2	ACT-2		32.95		12h-2	HSF15	25.83
		6h-2	ACT-2		33		12h-2	HSF15	25.9
		12h-2	HSF-22		35.99		6h-2	ACT-2	32.49
		12h-2	HSF-22		34.33		6h-2	ACT-2	31.75
		12h-2	HSF-22		36.5		6h-2	ACT-2	33.97
		12h-2	ACT-2		32.03		12h-2	ACT-2	32.16
		12h-2	ACT-2		31.26		12h-2	ACT-2	33.33
		12h-2	ACT-2		32.3		12h-2	ACT-2	32.59
		6h-3	HSF-22		37.26		6h-3	HSF15	26.85
		6h-3	HSF-22		37.85		6h-3	HSF15	26.78
		6h-3	HSF-22		39.59		6h-3	HSF15	26.93
		6h-3	ACT-2		31.58		12h-3	HSF15	26.93
		6h-3	ACT-2		32.65		12h-3	HSF15	27.08
		6h-3	ACT-2		32.18		12h-3	HSF15	27.07
		12h-3	HSF-22		33.65		6h-3	ACT-2	32.94
		12h-3	HSF-22		34.88		6h-3	ACT-2	32.35
		12h-3	HSF-22		41.35		6h-3	ACT-2	32.93
		12h-3	ACT-2		32.37		12h-3	ACT-2	32.12
		12h-3	ACT-2		32.17		12h-3	ACT-2	33.13
		12h-3	ACT-2		32.57		12h-3	ACT-2	33.26
		0h-1	HSF-22		33.38		0h-1	HSF15	28.62
		0h-1	HSF-22		33.56		0h-1	HSF15	28.44
		0h-1	HSF-22		34.27		0h-1	HSF15	28.72
		0h-1	ACT-2		30.65		0h-2	HSF15	26.49
		0h-1	ACT-2		31.12		0h-2	HSF15	26.47
		0h-1	ACT-2		30.64		0h-2	HSF15	26.47
		0h-2	HSF-22		33.37		0h-1	ACT-2	29.15
		0h-2	HSF-22		-		0h-1	ACT-2	31.7
		0h-2	HSF-22		33.62		0h-1	ACT-2	30.95
		0h-2	ACT-2		29.56		0h-2	ACT-2	29.27
		0h-2	ACT-2		29.03		0h-2	ACT-2	29.2
		0h-2	ACT-2		29.24		0h-2	ACT-2	28.89
		0h-3	HSF-22		31.45		0h-3	HSF15	26.43
		0h-3	HSF-22		31.16		0h-3	HSF15	26.29
		0h-3	HSF-22		31.09		0h-3	HSF15	26.25
		0h-3	ACT-2		28.44		0h-3	ACT-2	28.49
		0h-3	ACT-2		28.12		0h-3	ACT-2	28.24
		0h-3	ACT-2		28.49		0h-3	ACT-2	28.22
		2.19365	1.9141		4.76416
